# Supplementary material for: Construction of BPQDs/Ti3C2@TiO2 Composites with Favorable Charge Transfer Channels for Enhanced Photocatalytic Activity under Visible Light Irradiation
Source: PubMed Central journal article supplement (PMC7153474; doi:10.3390/nano10030452), 2020-03-03
Supplement: nanomaterials-10-00452-s001.pdf [file nanomaterials-10-00452-s001.pdf]

Supplementary

# Construction of BPQDs/Ti<sub>3</sub>C<sub>2</sub>@TiO<sub>2</sub> Composites with Favorable Charge Transfer Channels for Enhanced Photocatalytic Activity under Visible Light Irradiation

Ziyu Yao <sup>1,2,3</sup>, Huajun Sun <sup>1,2,3</sup>, Huiting Sui <sup>1,2,3</sup> and Xiaofang Liu <sup>4,\*</sup>

<sup>1</sup> State Key Laboratory of Silicate Materials for Architectures, Wuhan University of Technology, Wuhan 430070, China; silicate@whut.edu.cn (Z.Y.); webmaster@whut.edu.cn (Huiting Sui); hsxy@whut.edu.cn (Huajun Sun)

<sup>2</sup> School of Materials Science and Engineering, Wuhan University of Technology, Wuhan 430070, China

<sup>3</sup> Advanced Ceramics Institute of Zibo New & High-Tech Industrial Development Zone, Zibo 255000, China

<sup>4</sup> School of Chemistry, Chemical Engineering and Life Sciences, Wuhan University of Technology, Wuhan 430070, China

\* Correspondence: hsxy@whut.edu.cn

Received: 10 January 2020; Accepted: 27 February 2020; Published: date

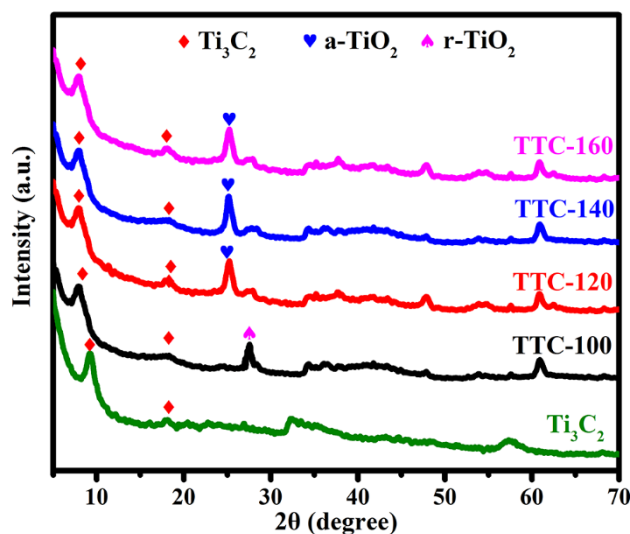

**Figure S1:** XRD patterns of Ti<sub>3</sub>C<sub>2</sub> and TTC-x. (x=100, 120, 140 and 160 °C, respectively).

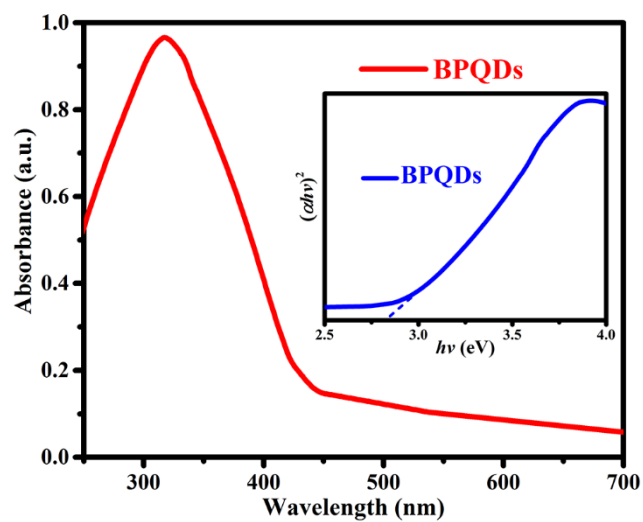

**Figure S2:** UV-vis DRS and plots of  $(\alpha h\nu)^2$  vs  $h\nu$  curves of BPQDs.

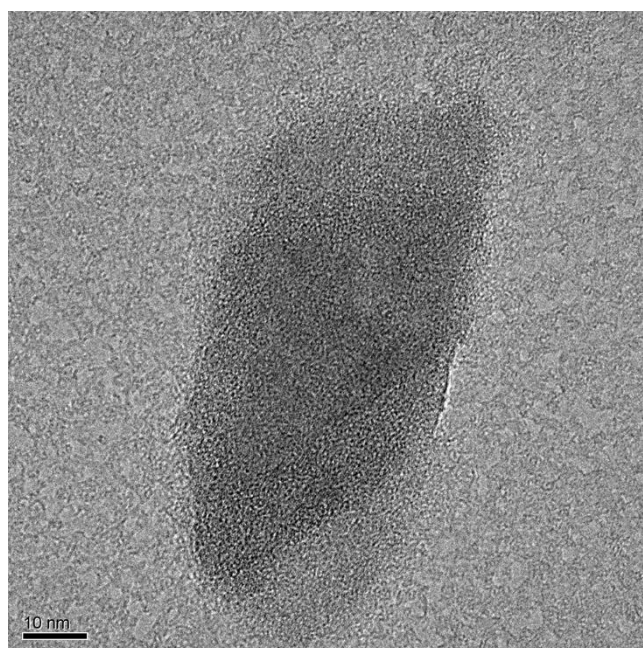

**Figure S3:** HRTEM image of black phosphorus nanosheets.

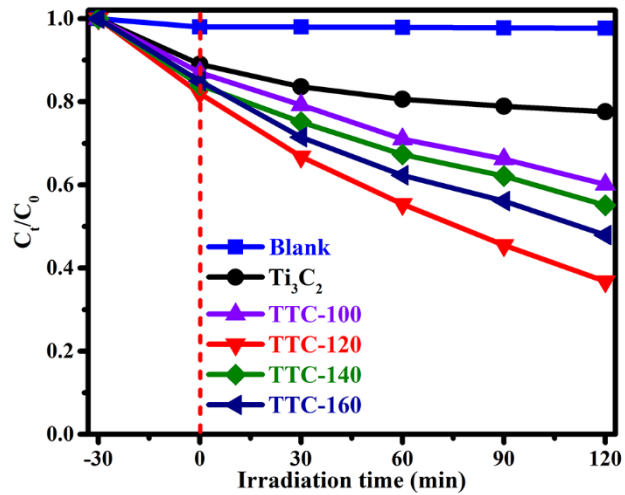

**Figure S4:** Comparison on the photocatalytic efficiency of pristine  $Ti_3C_2$  and TTC-x composites (10 mg/L MO solution).

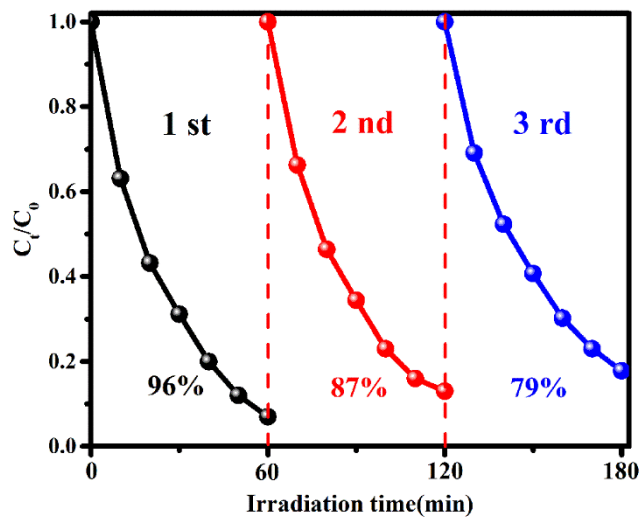

**Figure S5:** Cycling degradation curves of MO solution in the presence of BTTC-120 composite.

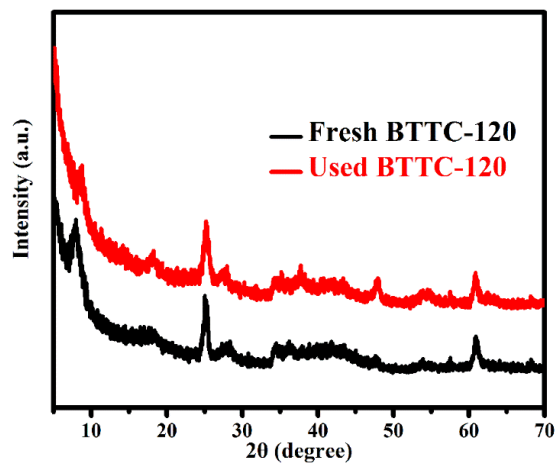

**Figure S6:** The XRD patterns of used and fresh BTTC-120 sample.

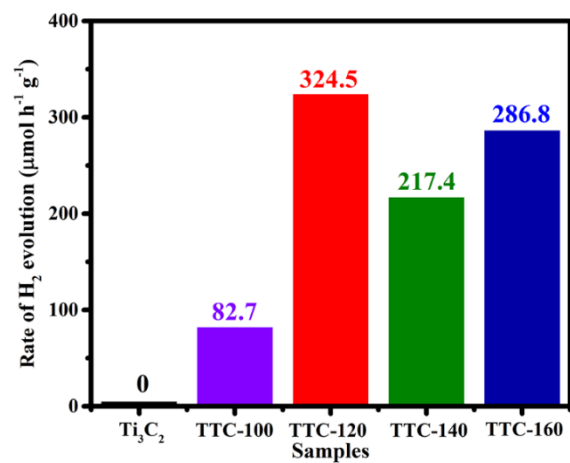

**Figure S7:** The photocatalytic hydrogen evolution rate of Ti<sub>3</sub>C<sub>2</sub> and TTC-x (x=100, 120, 140 and 160 °C, respectively).
